# Supplementary material for: Distinct epigenetic features of differentiation-regulated replication origins
Source: PubMed Central journal article supplement (PMC4862150; doi:10.1186/s13072-016-0067-3), 2016-05-10

## Supplemental Table Legends

### Table S1a Replication origin profiles

Replication origins were identified by massively parallel sequencing of nascent strand preparations from the indicated cell lines isolated either by BrdU immunoprecipitation (BrdU) or by  $\lambda$ -exonuclease digestion (Exo). If both methods were used to map origins in a particular cell line, an asterisk indicates the mapping method used to generate data in the current paper. The number of peaks, average peak size, distance between the peaks and % of genome coverage are indicated. Citations in the rightmost (ref.) column refer to the sources of origin data (reference number if published and “this work” if unpublished) and citations below the table refer to the source of cell lines.

**Table S1b Replicate comparisons.** Comparisons among replicates of nascent strand preparations (HCT116, U2OS, K562) and among nascent strand peaks called against various preparations of genomic DNA. Five pairs of replicates were compared. The first pair contained peaks from two independent preparations of HCT116 nascent strands prepared using the  $\lambda$ -exonuclease method. The second pair contained peaks from HCT116 nascent strands isolated using the BrdU method and called against BrdU substituted and unsubstituted genomic DNA. The third pair contained peaks from two independent nascent strand preparations from U2OS cells. The fourth pair contained two independent preparations of K562 nascent strands (one prepared in this study and the other prepared independently in another lab with the resulting peaks accessed in GEO). The fifth pair contained peaks from a preparation of MCF7 nascent strands called

vs. G0 genomic DNA and  $\lambda$ -exonuclease digested genomic DNA. For each pair, “all peaks” represent the number of peaks in the specific replicate, “# of peaks colocalized with replicate peaks” represent the number of peaks in the replicate that were also present within 2 kb of peaks in the second replicate.

**Table S1c Genomic distribution of replication origins.**

**Table S2a Characterization of shared and cell-specific replication origins in non-cancer cells.** Groups of shared and cell-type specific origins identified among non-cancer cells are listed. BED files containing replication origin peaks were generated by the SICER program and used in sequential intersections (see Methods for details). Each row depicts the results of intersection between two BED files: the first containing origin peaks from the reference cell and the second containing origin peaks from one or more “comparison cell”(s). (Colocalized peaks were defined as peaks located within less than 2 kb of each other). For example, in row 1, “All Peaks” depicts the number of peaks in AS\_iPS nascent strands (reference cell file); “Colocalized Peaks” depicts the number of peaks present in AS\_iPS and PWS\_iPS; “Specific Peaks” depicts the number of peaks present in AS\_iPS and absent from the PWS\_iPS file. Rows 2 and 3 follow the same patterns with the same reference cell file and with files containing origin peaks from ES and EB, respectively, as comparison cells. In row 4, the reference file is AS\_iPS and the comparator file is a file containing peaks from both ES and EB. Hence, “All Peaks” depicts the number of peaks in AS\_iPS nascent strands (reference cell file); “Colocalized

Peaks” depicts the number of peaks present in AS\_iPS, ES and EB files; “Specific Peaks” depicts the number of peaks present in AS\_iPS and absent from both ES and EB.

**Table S2b Characterization of replication origins in cancer cells**

Groups of shared and cell-type specific origins identified among cancer cells are listed using the same methodology and conventions described in the legend to Table S2A.

**Table S3. Input and output for Chi squared test of independence for data shown in Table 2.**

**Table S4. Colocalization of replication origins with select chromatin marks.** (AMI values correspond to the images shown in Fig. 4.)

**Table S5. Distribution of EB and K562 replication origins during early, middle and late S-phase.** (Values correspond to the images shown in Figure 8.)

**Supplemental Figure Legends**

**Fig. S1** Screenshots of integrated genome viewer depicting replication initiation profiles in the **(a)** DHFR locus of chromosome 5, **(b)** HPRT locus of chromosome X and **(c)** LMNB2 locus of chromosome 19. For each screenshot, a chromosome map is shown in the top row with the mapped region delineated by a red rectangle. The second row shows the scale of the region being mapped and chromosomal coordinates are shown below the scale. RefSeq genes are shown underneath the chromosomal coordinates, above a

series of experimental tracks showing the distribution of replication origins in the nascent strand preparations from cell lines indicated on the left.

**Fig. S2** Results of the Irreproducibility Discovery Rate (IDR) test comparing shared and cell-type specific origins. **a** Origin files from the two iPS cell lines (AS\_iPS and PWS\_iPS).  
**b** Origin files from AS\_iPS and U2OS cells

**Fig. S3** ColoWeb alignment of representative chromatin features with nascent strand abundance from several cancer and non-cancer cell lines. Graphic representations are shown as described in the Fig. 3 legend. Chromatin features depicted in the figure were also profiled in the graphs shown in Fig. 4

**Table S1A**

| Name    | Type of Cell              | Cell Line Reference           | # of origin peaks | Method      | average peak length (bp) | average distance (kb) between peaks | % of genome covered | Ref.           |
|---------|---------------------------|-------------------------------|-------------------|-------------|--------------------------|-------------------------------------|---------------------|----------------|
| EB      | Basophilic Erythroblasts  | Mukhopadhyay et al, 2014      | 144,753           | BrdU* + Exo | 3809.3                   | 16.9                                | 18                  | 51             |
| ES      | H1ES, Embryonic stem cell | Thomson et al, 1998           | 90,621            | BrdU        | 4759.6                   | 28.3                                | 14                  | 52             |
| AS_IPS  | iPS                       | Chamberlain et al, 2010       | 119,258           | Exo         | 3793.9                   | 21.3                                | 15                  | This work      |
| PWS_IPS | iPS                       | Chamberlain et al, 2010       | 124,707           | Exp         | 3241.8                   | 18.9                                | 15                  | This work      |
|         |                           |                               |                   |             |                          |                                     |                     |                |
| K562    | Erythroleukemia           | Lozzio CB and Lozzio BB, 1975 | 201,952           | BrdU + Exo* | 3453.9                   | 11.1                                | 23                  | 9 + This work  |
| MCF7    | Breast adenocarcinoma     | Soule HD et al, 1973          | 161,358           | Exo         | 3350.5                   | 11.9                                | 22                  | 9              |
| HCT116  | Colorectal carcinoma      | Brattain MG, et al, 1981      | 78,339            | BrdU + Exo* | 3861.6                   | 34.3                                | 10                  | 50 + This work |
| U2OS    | Osteosarcoma              | Ponten J and Saksela E, 1967  | 92,210            | Exo         | 3948.3                   | 28.5                                | 12                  | This work      |

## Cell Line References:

EB: Mukhopadhyay R, Lajugie J, Fourel N, Selzer A, Schizas M, Bartholdy B, Mar J, Lin CM, Martin MM, Ryan M *et al*: **Allele-Specific Genome-wide Profiling in Human Primary Erythroblasts Reveal Replication Program Organization**. *PLoS genetics* 2014, **10**(5):e1004319.

ES: James A. Thomson, Joseph Itskovitz-Eldor, Sander S. Shapiro, Michelle A. Waknitz, Jennifer J. Swiergiel, Vivienne S. Marshall, and Jeffrey M. Jones: **Embryonic Stem Cell Lines Derived from Human Blastocysts** *Science* 6 November 1998: 282 (5391), 1145-1147.

iPS: Chamberlain SJ, Chen PF, Ng KY, Bourgois-Rocha F, Lemtiri-Chlieh F, Levine ES, Lalande M: **Induced pluripotent stem cell models of the genomic imprinting disorders Angelman and Prader-Willi syndromes**. *Proceedings of the National Academy of Sciences of the United States of America* 2010, **107**(41):17668-17673.

K562: Brattain MG, et al. Heterogeneity of malignant cells from a human colonic carcinoma. *Cancer Res.* 41: 1751-1756, 1981.

MCF7: Ponten J, Saksela E. Two established in vitro cell lines from human mesenchymal tumours. *Int. J. Cancer* 2: 434-447, 1967.

HCT116: Lozzio CB, Lozzio BB. Human chronic myelogenous leukemia cell-line with positive Philadelphia chromosome. *Blood* 45: 321-334, 1975.

U2OS: Soule HD, et al. A human cell line from a pleural effusion derived from a breast carcinoma. *J. Natl. Cancer Inst.* 51: 1409-1416, 1973.

\* Both BrdU and lambda exonuclease based NS samples were sequenced with similar profiles; the results in the paper are based on a single preparation as indicated by \* .

Table S1b

|                                                   | <b># of all peaks</b> | <b># of peaks<br/>colocalized with<br/>replicate peaks</b> | <b>% colocalized<br/>peaks</b> |
|---------------------------------------------------|-----------------------|------------------------------------------------------------|--------------------------------|
| HCT116 (Exo) replicate 1                          | 78339                 | 68023                                                      | 87.1                           |
| HCT116 (Exo) replicate 2                          | 109125                | 72870                                                      | 66.8                           |
|                                                   |                       |                                                            |                                |
| HCT116 (BrdU) called vs. BrdU substituted genomic | 65544                 | 63296                                                      | 96.5                           |
| HCT116 (BrdU) called vs. unsubstituted genomic    | 62573                 | 62491                                                      | 99.9                           |
|                                                   |                       |                                                            |                                |
| U2OS replicate 1                                  | 89300                 | 65088                                                      | 73.0                           |
| U2OS replicate 2                                  | 92210                 | 62374                                                      | 67.3                           |
|                                                   |                       |                                                            |                                |
| K562, GSE46189 (Picard et al)                     | 37074                 | 31335                                                      | 84.5                           |
| K562, this study                                  | 201952                | 28334                                                      | 16.0                           |
|                                                   |                       |                                                            |                                |
| MCF7 (Exo) called vs. G0 genomic                  | 192461                | 173153                                                     | 90.0                           |
| MCF7 (Exo) called vs. Exo digested genomic        | 161358                | 161358                                                     | 100.0                          |

Table S1c

|                |                      | <b>% peaks in exons</b> | <b>% peaks in introns</b> | <b>% partially in exon/intron</b> | <b>% peaks in promoters</b> | <b>% intergenic peaks</b> |
|----------------|----------------------|-------------------------|---------------------------|-----------------------------------|-----------------------------|---------------------------|
| <b>AS_IPS</b>  | <b>All</b>           | <b>9.5</b>              | <b>46.6</b>               | <b>3.5</b>                        | <b>8.3</b>                  | <b>40.4</b>               |
| <b>PWS_IPS</b> | <b>All</b>           | <b>10.3</b>             | <b>47.4</b>               | <b>4</b>                          | <b>9.2</b>                  | <b>38.2</b>               |
| <b>EB</b>      | <b>All</b>           | <b>8</b>                | <b>46.3</b>               | <b>4.1</b>                        | <b>7.4</b>                  | <b>41.6</b>               |
| <b>ES</b>      | <b>All</b>           | <b>7.1</b>              | <b>46</b>                 | <b>2.5</b>                        | <b>5.6</b>                  | <b>44.4</b>               |
| <b>K562</b>    | <b>All</b>           | <b>7.7</b>              | <b>48</b>                 | <b>1.2</b>                        | <b>5.2</b>                  | <b>43.2</b>               |
| <b>MCF7</b>    | <b>All</b>           | <b>1</b>                | <b>29.5</b>               | <b>27.4</b>                       | <b>19.4</b>                 | <b>42</b>                 |
| <b>HCT116</b>  | <b>All</b>           | <b>12.6</b>             | <b>46.4</b>               | <b>5.8</b>                        | <b>12.8</b>                 | <b>35.2</b>               |
| <b>U2OS</b>    | <b>All</b>           | <b>1</b>                | <b>25.8</b>               | <b>37</b>                         | <b>28.1</b>                 | <b>36.1</b>               |
| <b>AS_IPS</b>  | <b>Shared</b>        | <b>1.0</b>              | <b>23.9</b>               | <b>42.7</b>                       | <b>34.1</b>                 | <b>32.4</b>               |
|                | <b>Cell-specific</b> | <b>1.1</b>              | <b>37.6</b>               | <b>8.1</b>                        | <b>5.7</b>                  | <b>53.2</b>               |
| <b>PWS_IPS</b> | <b>Shared</b>        | <b>1.0</b>              | <b>23.8</b>               | <b>43.1</b>                       | <b>33.7</b>                 | <b>32.2</b>               |
|                | <b>Cell-specific</b> | <b>2.2</b>              | <b>42.5</b>               | <b>10.2</b>                       | <b>7.0</b>                  | <b>45.2</b>               |
| <b>ES</b>      | <b>Shared</b>        | <b>0.7</b>              | <b>20.3</b>               | <b>48.5</b>                       | <b>37.8</b>                 | <b>30.6</b>               |
|                | <b>Cell-specific</b> | <b>0.6</b>              | <b>35.3</b>               | <b>15.1</b>                       | <b>7.6</b>                  | <b>49.0</b>               |
| <b>EB</b>      | <b>Shared</b>        | <b>1.0</b>              | <b>23.4</b>               | <b>43.3</b>                       | <b>34.3</b>                 | <b>32.4</b>               |
|                | <b>Cell-specific</b> | <b>1.1</b>              | <b>38.9</b>               | <b>10.8</b>                       | <b>6.8</b>                  | <b>49.2</b>               |
| <b>HCT116</b>  | <b>Shared</b>        | <b>1.1</b>              | <b>22.9</b>               | <b>44.5</b>                       | <b>34.6</b>                 | <b>31.6</b>               |
|                | <b>Cell-specific</b> | <b>2.3</b>              | <b>26.8</b>               | <b>31.8</b>                       | <b>27.6</b>                 | <b>39.1</b>               |
| <b>MCF7</b>    | <b>Shared</b>        | <b>0.8</b>              | <b>20.9</b>               | <b>46.7</b>                       | <b>35.9</b>                 | <b>31.6</b>               |
|                | <b>Cell-specific</b> | <b>1.0</b>              | <b>36.6</b>               | <b>12.5</b>                       | <b>7.2</b>                  | <b>49.9</b>               |
| <b>U2OS</b>    | <b>Shared</b>        | <b>1.0</b>              | <b>22.5</b>               | <b>45.6</b>                       | <b>35.4</b>                 | <b>30.9</b>               |
|                | <b>Cell-specific</b> | <b>1.2</b>              | <b>32.4</b>               | <b>13.4</b>                       | <b>8.5</b>                  | <b>53.0</b>               |
| <b>K562</b>    | <b>Shared</b>        | <b>0.8</b>              | <b>21.7</b>               | <b>45.8</b>                       | <b>35.4</b>                 | <b>31.7</b>               |
|                | <b>Cell-specific</b> | <b>1.1</b>              | <b>37.5</b>               | <b>14.1</b>                       | <b>8.0</b>                  | <b>47.3</b>               |

Table S2a

| Row Number | Reference Cell | Comparison Cell         | Peaks in reference cells | Colocalized Peaks (in both reference and comparison cells) | Specific Peaks (only in reference) | % Colocalized | % Specific |
|------------|----------------|-------------------------|--------------------------|------------------------------------------------------------|------------------------------------|---------------|------------|
| 1          | AS_IPS         | PWS_IPS                 | 119258                   | 104887                                                     | 15056                              | 87.9          | 12.6       |
| 2          | AS_IPS         | ES                      | 119258                   | 70431                                                      | 48964                              | 59.1          | 41.1       |
| 3          | AS_IPS         | EB                      | 119258                   | 102045                                                     | 17898                              | 85.6          | 15.0       |
|            |                |                         |                          |                                                            |                                    |               |            |
| 4          | AS_IPS         | ES and EB               | 119258                   | 67431                                                      | 14896                              | 56.5          | 12.5       |
|            |                |                         |                          |                                                            |                                    |               |            |
| 5          | PWS_IPS        | AS_IPS                  | 124707                   | 110105                                                     | 25292                              | 88.3          | 20.3       |
| 6          | PWS_IPS        | ES                      | 124707                   | 80130                                                      | 54734                              | 64.3          | 43.9       |
| 7          | PWS_IPS        | EB                      | 124707                   | 114905                                                     | 20492                              | 92.1          | 16.4       |
|            |                |                         |                          |                                                            |                                    |               |            |
| 8          | PWS_IPS        | ES and EB               | 124707                   | 68893                                                      | 16471                              | 55.2          | 13.2       |
|            |                |                         |                          |                                                            |                                    |               |            |
| 9          | ES             | AS_IPS                  | 90621                    | 67264                                                      | 23357                              | 74.2          | 25.8       |
| 10         | ES             | PWS_IPS                 | 90621                    | 71770                                                      | 18851                              | 79.2          | 20.8       |
| 11         | ES             | EB                      | 90621                    | 78119                                                      | 12502                              | 86.2          | 13.8       |
|            |                |                         |                          |                                                            |                                    |               |            |
| 12         | ES             | EB and AS_IPS           | 90621                    | 64921                                                      | 10159                              | 71.6          | 11.2       |
| 13         | ES             | EB, AS_IPS, and PWS_IPS | 90621                    | 62477                                                      | 8507                               | 68.9          | 9.4        |
|            |                |                         |                          |                                                            |                                    |               |            |
| 14         | EB             | AS_IPS                  | 144753                   | 102127                                                     | 42625                              | 70.6          | 29.4       |
| 15         | EB             | PWS_IPS                 | 144753                   | 110019                                                     | 34733                              | 76.0          | 24.0       |
| 16         | EB             | ES                      | 144753                   | 85920                                                      | 58832                              | 59.4          | 40.6       |
|            |                |                         |                          |                                                            |                                    |               |            |
| 17         | EB             | ES and AS_IPS           | 144753                   | 69106                                                      | 25811                              | 47.7          | 17.8       |
| 18         | EB             | ES, AS_IPS and PWS_IPS  | 144753                   | 65466                                                      | 18366                              | 45.2          | 12.7       |



Table S2b

| Row Number | Reference Cell | Comparison Cell        | Peaks in reference cells | Colocalized Peaks (in both reference and comparison cells) | Specific Peaks (only in reference) | % Colocalized | % Specific |
|------------|----------------|------------------------|--------------------------|------------------------------------------------------------|------------------------------------|---------------|------------|
| 1          | K562           | MCF7                   | 201952                   | 135194                                                     | 41880                              | 66.9          | 20.7       |
| 2          | K562           | HCT116                 | 201952                   | 80002                                                      | 122651                             | 39.6          | 60.7       |
| 3          | K562           | U2OS                   | 201952                   | 91206                                                      | 111447                             | 45.2          | 55.2       |
|            |                |                        |                          |                                                            |                                    |               |            |
| 4          | K562           | MCF7 and HCT116        | 201952                   | 76994                                                      | 38872                              | 38.1          | 19.2       |
| 5          | K562           | MCF7, HCT116, and U2OS | 201952                   | 64972                                                      | 35266                              | 32.2          | 17.5       |
|            |                |                        |                          |                                                            |                                    |               |            |
| 6          | MCF7           | K562                   | 192451                   | 130245                                                     | 32368                              | 67.7          | 16.8       |
| 7          | MCF7           | HCT116                 | 192451                   | 78407                                                      | 114711                             | 40.7          | 59.6       |
| 8          | MCF7           | U2OS                   | 192451                   | 88347                                                      | 104771                             | 45.9          | 54.4       |
|            |                |                        |                          |                                                            |                                    |               |            |
| 9          | MCF7           | K562 and HCT116        | 192451                   | 74932                                                      | 28893                              | 38.9          | 15.0       |
| 10         | MCF7           | K562, HCT116, and U2OS | 192451                   | 62930                                                      | 26100                              | 32.7          | 13.6       |
|            |                |                        |                          |                                                            |                                    |               |            |
| 11         | HCT116         | K562                   | 78339                    | 68143                                                      | 7773                               | 87.0          | 9.9        |
| 12         | HCT116         | MCF7                   | 78339                    | 71419                                                      | 7440                               | 91.2          | 9.5        |
| 13         | HCT116         | U2OS                   | 78339                    | 64881                                                      | 13978                              | 82.8          | 17.8       |
|            |                |                        |                          |                                                            |                                    |               |            |
| 14         | HCT116         | K562 and MCF7          | 78339                    | 68539                                                      | 4893                               | 87.5          | 6.2        |
| 15         | HCT116         | K562, MCF7, and U2OS   | 78339                    | 57873                                                      | 1319                               | 73.9          | 1.7        |
|            |                |                        |                          |                                                            |                                    |               |            |
| 16         | U2OS           | K562                   | 92210                    | 77973                                                      | 11281                              | 84.6          | 12.2       |
| 17         | U2OS           | MCF7                   | 92210                    | 80495                                                      | 12318                              | 87.3          | 13.4       |
| 18         | U2OS           | HCT116                 | 92210                    | 67628                                                      | 25185                              | 73.3          | 27.3       |
|            |                |                        |                          |                                                            |                                    |               |            |
| 19         | U2OS           | K562 and MCF7          | 92210                    | 76784                                                      | 7570                               | 83.3          | 8.2        |
| 20         | U2OS           | K562, MCF7, and HCT116 | 92210                    | 60631                                                      | 3955                               | 65.8          | 4.3        |

**Table S3: Input and Output for Chi squared test of Independence**

**A: AS\_IPS input**

| AS_IPS     | ORI-CGI | ORI not-CGI | row sum |
|------------|---------|-------------|---------|
| Shared     | 16998   | 47451       | 64449   |
| Specific   | 948     | 14841       | 15789   |
| Partial    | 4038    | 31449       | 35487   |
| column sum | 21984   | 93741       | 115725  |

**B: PWS\_IPS input**

| PWS_IPS    | ORI-CGI | ORI not-CGI | row sum |
|------------|---------|-------------|---------|
| Shared     | 17272   | 51621       | 68893   |
| Specific   | 799     | 16182       | 16981   |
| Partial    | 4382    | 40970       | 45352   |
| column sum | 22453   | 108773      | 131226  |

**C: ES input**

| ES         | ORI-CGI | ORI not-CGI | row sum |
|------------|---------|-------------|---------|
| Shared     | 16935   | 39751       | 56686   |
| Specific   | 76      | 15270       | 15346   |
| Partial    | 1125    | 17464       | 18589   |
| column sum | 18136   | 72485       | 90621   |

**D: EB input**

| EB         | ORI-CGI | ORI not-CGI | row sum |
|------------|---------|-------------|---------|
| Shared     | 32749   | 91738       | 124487  |
| Specific   | 69      | 3924        | 3993    |
| Partial    | 4460    | 31387       | 35847   |
| column sum | 37278   | 127049      | 164327  |

**E: Normal Cell**

| Output       | AS_IPS  | PWS_IPS | ES      | EB      |
|--------------|---------|---------|---------|---------|
| df           | 2       | 2       | 2       | 2       |
| Chi sq value | 5350.01 | 6694.59 | 9359.48 | 4075.59 |
| p-value      | <0.0001 | <0.0001 | <0.0001 | <0.0001 |

**F: K562 input**

| K562       | ORI-CGI | ORI not-CGI | row sum |
|------------|---------|-------------|---------|
| Shared     | 10824   | 37968       | 48792   |
| Specific   | 549     | 37385       | 37934   |
| Partial    | 8532    | 88328       | 96860   |
| column sum | 19905   | 163681      | 183586  |

**G: MCF7 input**

| MCF7       | ORI-CGI | ORI not-CGI | row sum |
|------------|---------|-------------|---------|
| Shared     | 8228    | 35227       | 43455   |
| Specific   | 278     | 25727       | 26005   |
| Partial    | 2400    | 82222       | 84622   |
| column sum | 10906   | 143176      | 154082  |

**H: HCT116 input**

| HCT116     | ORI-CGI | ORI not-CGI | row sum |
|------------|---------|-------------|---------|
| Shared     | 9565    | 36930       | 46495   |
| Specific   | 387     | 1002        | 1389    |
| Partial    | 9007    | 19049       | 28056   |
| column sum | 18959   | 56981       | 75940   |

**I: U2OS input**

| U2OS       | ORI-CGI | ORI not-CGI | row sum |
|------------|---------|-------------|---------|
| Shared     | 10522   | 37198       | 47720   |
| Specific   | 122     | 31985       | 32107   |
| Partial    | 7194    | 29417       | 36611   |
| column sum | 17838   | 98600       | 116438  |

**J: Cancer Cell Output**

|              | K562    | MCF7     | HCT116  | U2OS    |
|--------------|---------|----------|---------|---------|
| df           | 2       | 2        | 2       | 2       |
| Chi sq value | 10370.8 | 13030.75 | 1248.41 | 7719.08 |
| p-value      | <0.0001 | <0.0001  | <.0001  | <.0001  |

Table S4:

| Modification | MCF7 | K562 | ES    | EB   |
|--------------|------|------|-------|------|
| H3K27Ac      | 41.3 | 40.8 | 138.9 | 57.4 |
| H3K4Me3      | 57.9 | 36.7 | 109.5 | 53.9 |
| UnMe-CpG     | 68.3 | 40.3 | 188.4 | 91.4 |
| Me-CpG       | 15.5 | 9.3  | 27.3  | 25.6 |
| Pol2         | 37.4 | 36.4 | 85.6  | 62.8 |
| H3K9Me3      | 26.5 | 15.1 | 84.7  | 15.7 |
| DNase1       | 21.8 | 22.2 | 61.9  | 27.9 |

Table S5

| Reference file | Comparator file     | Reference peaks # | Comparator peaks # | Ref. peaks colocalized with comparator |
|----------------|---------------------|-------------------|--------------------|----------------------------------------|
| EB shared      | EB early quintile   | 122,603           | 32,714             | 30,392 (40.1%)                         |
| EB shared      | EB mid quintile     | 122,603           | 32,715             | 27,275 (36%)                           |
| EB shared      | EB late quintile    | 122,603           | 32,713             | 18,092 (23.9%)                         |
|                |                     |                   |                    | Total peaks: 75,758 (100%)             |
| EB specific    | EB early quintile   | 3,950             | 32,714             | 207 (7.9%)                             |
| EB specific    | EB mid quintile     | 3,950             | 32,715             | 591 (22.5%)                            |
| EB specific    | EB late quintile    | 3,950             | 32,713             | 1,825 (69.6%)                          |
|                |                     |                   |                    | Total peaks: 2,623 (100.000%)          |
| K562 shared    | K562 early quintile | 64,972            | 11,546             | 8,486 (58.5%)                          |
| K562 shared    | K562 mid quintile   | 64,972            | 11,545             | 4,507 (31.1%)                          |
| K562 shared    | K562 late quintile  | 64,972            | 11,545             | 1,514 (10.4%)                          |
|                |                     |                   |                    | Total peaks: 14,507 (100%)             |
| K562 specific  | K562 early quintile | 35,266            | 11,546             | 489 (9.2%)                             |
| K562 specific  | K562 mid quintile   | 35,266            | 11,545             | 1,585 (29.2%)                          |
| K562 specific  | K562 late quintile  | 35,266            | 11,545             | 3,263 (61.1%)                          |
|                |                     |                   |                    | Total peaks: 5,337 (100%)              |

Figure S1A

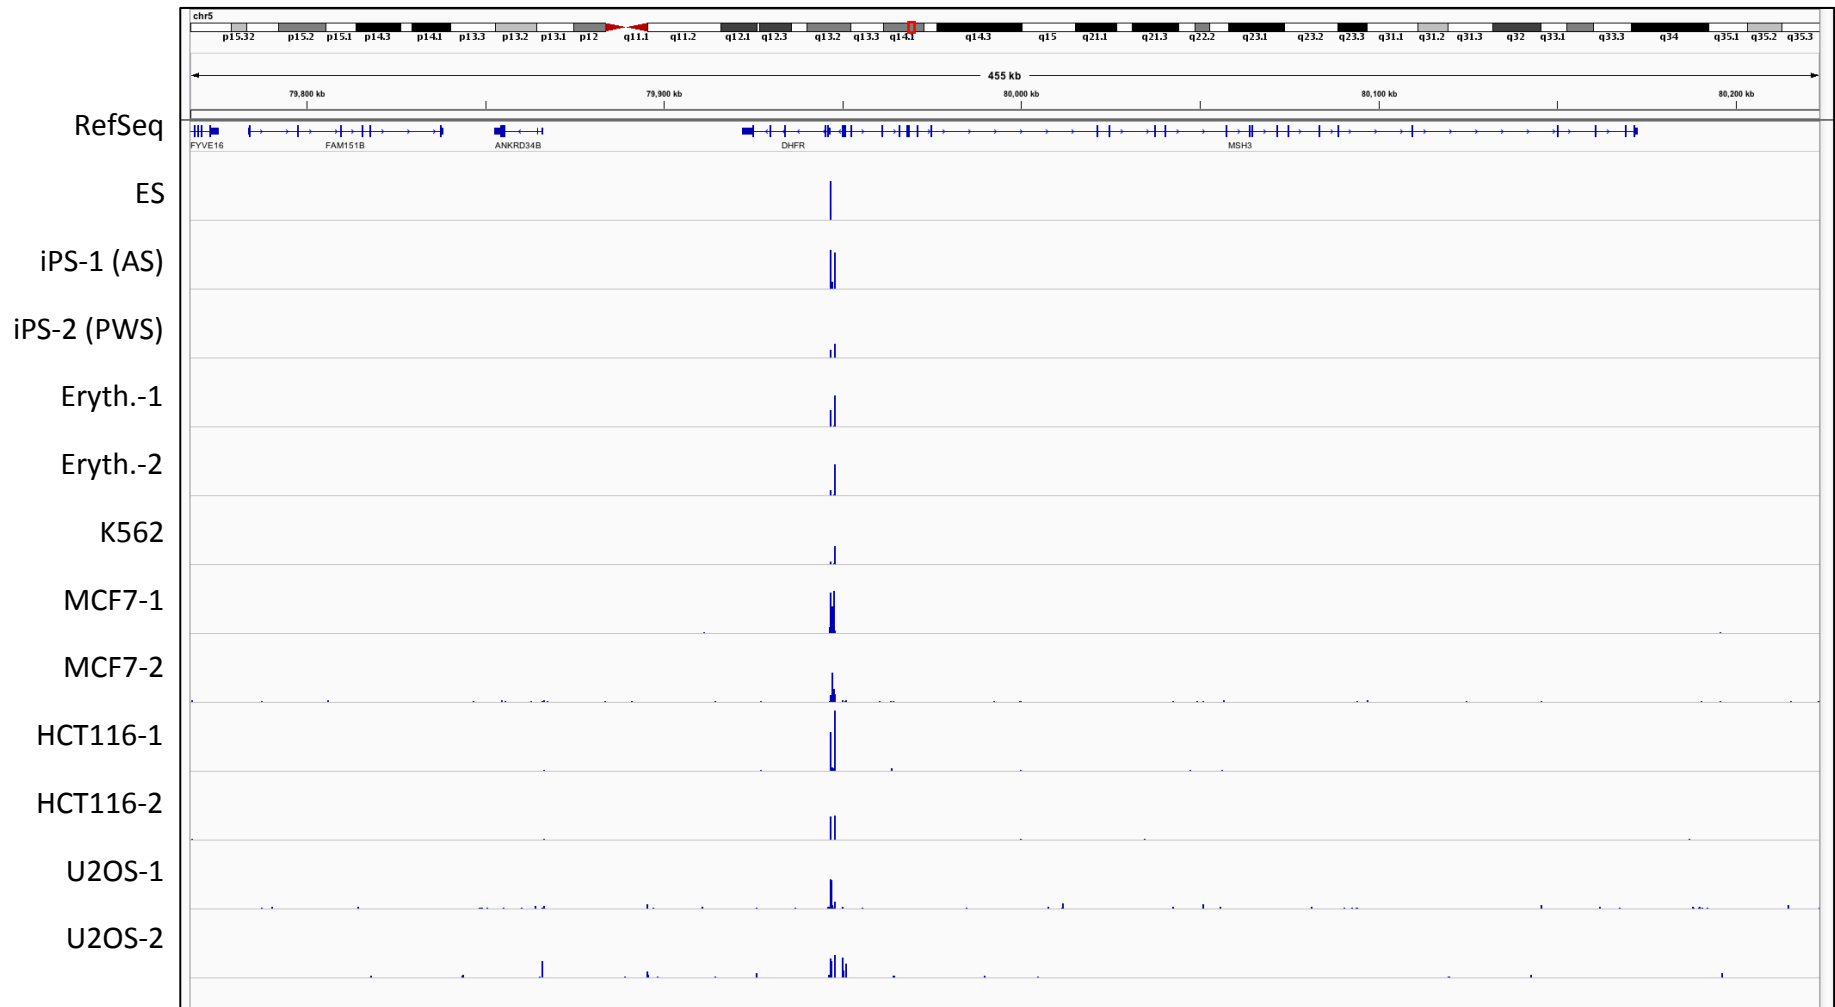

Figure S1B

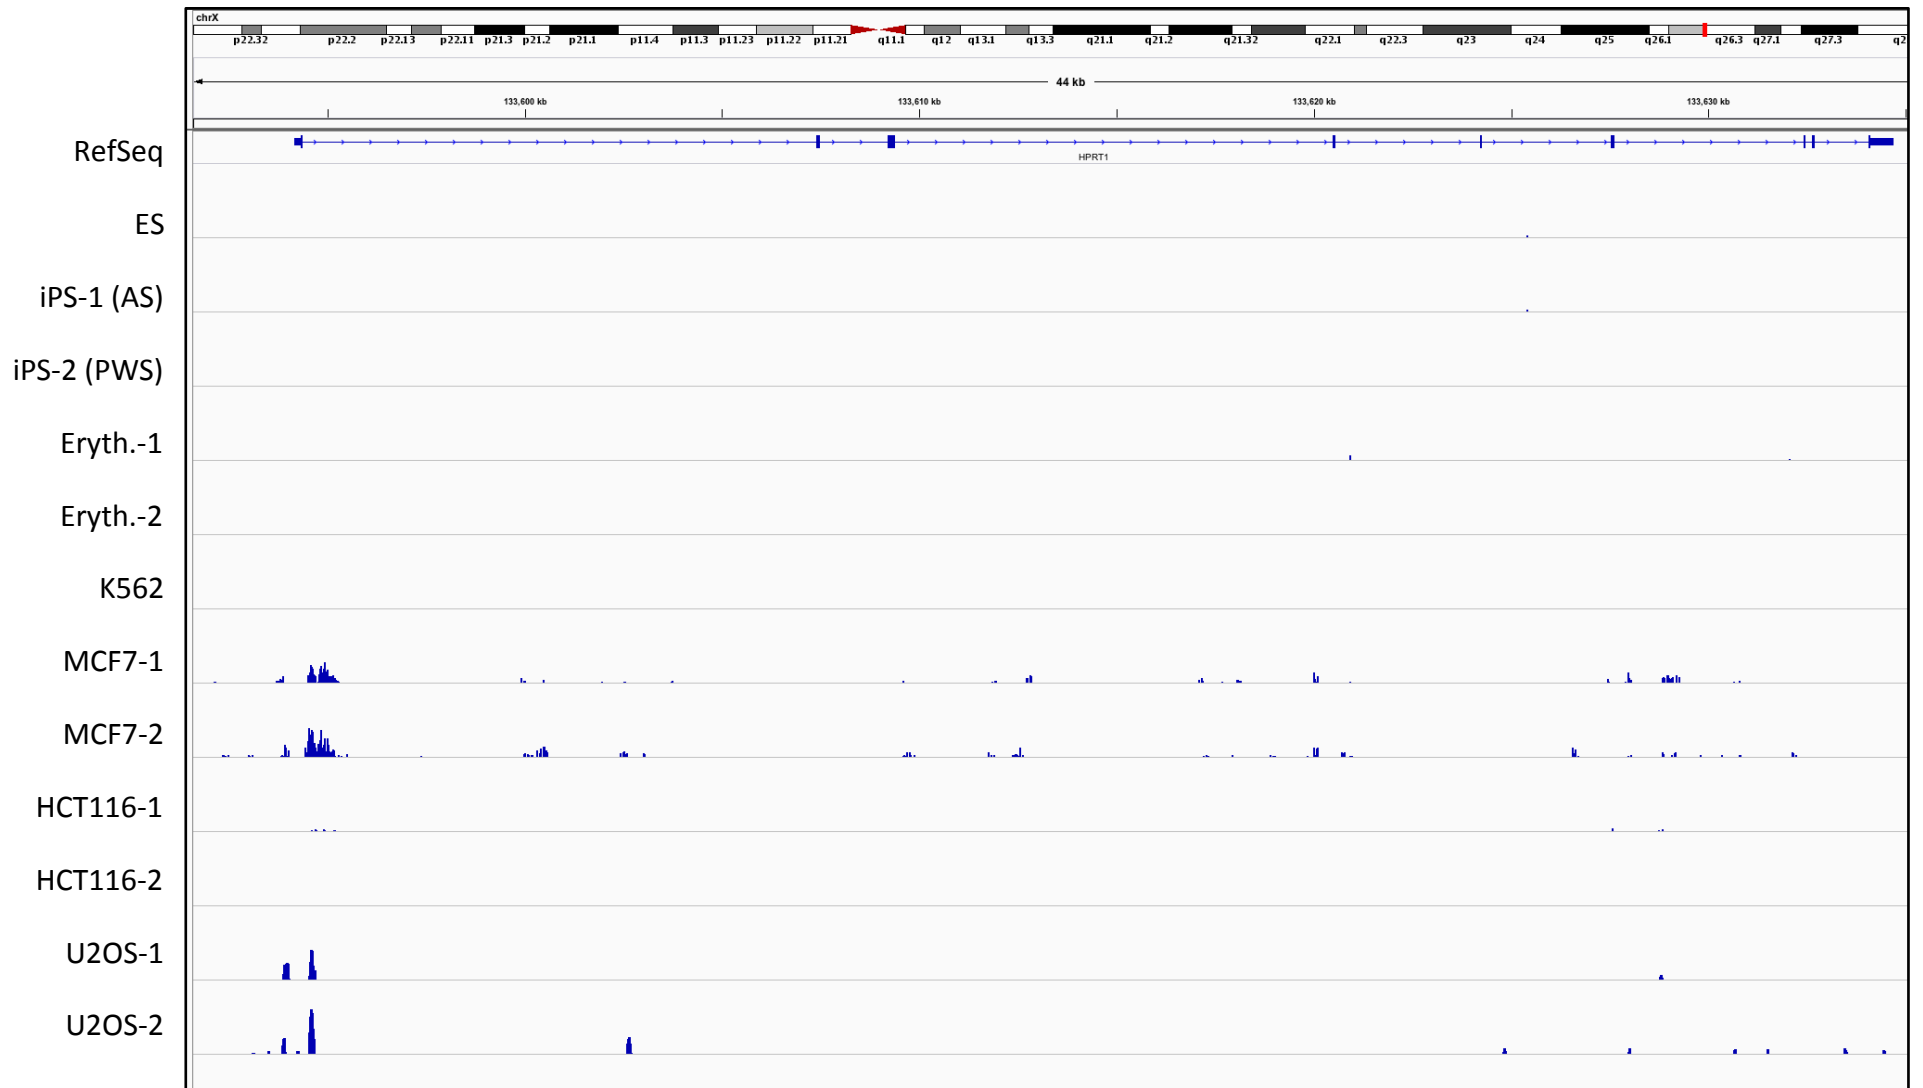

Figure S1C

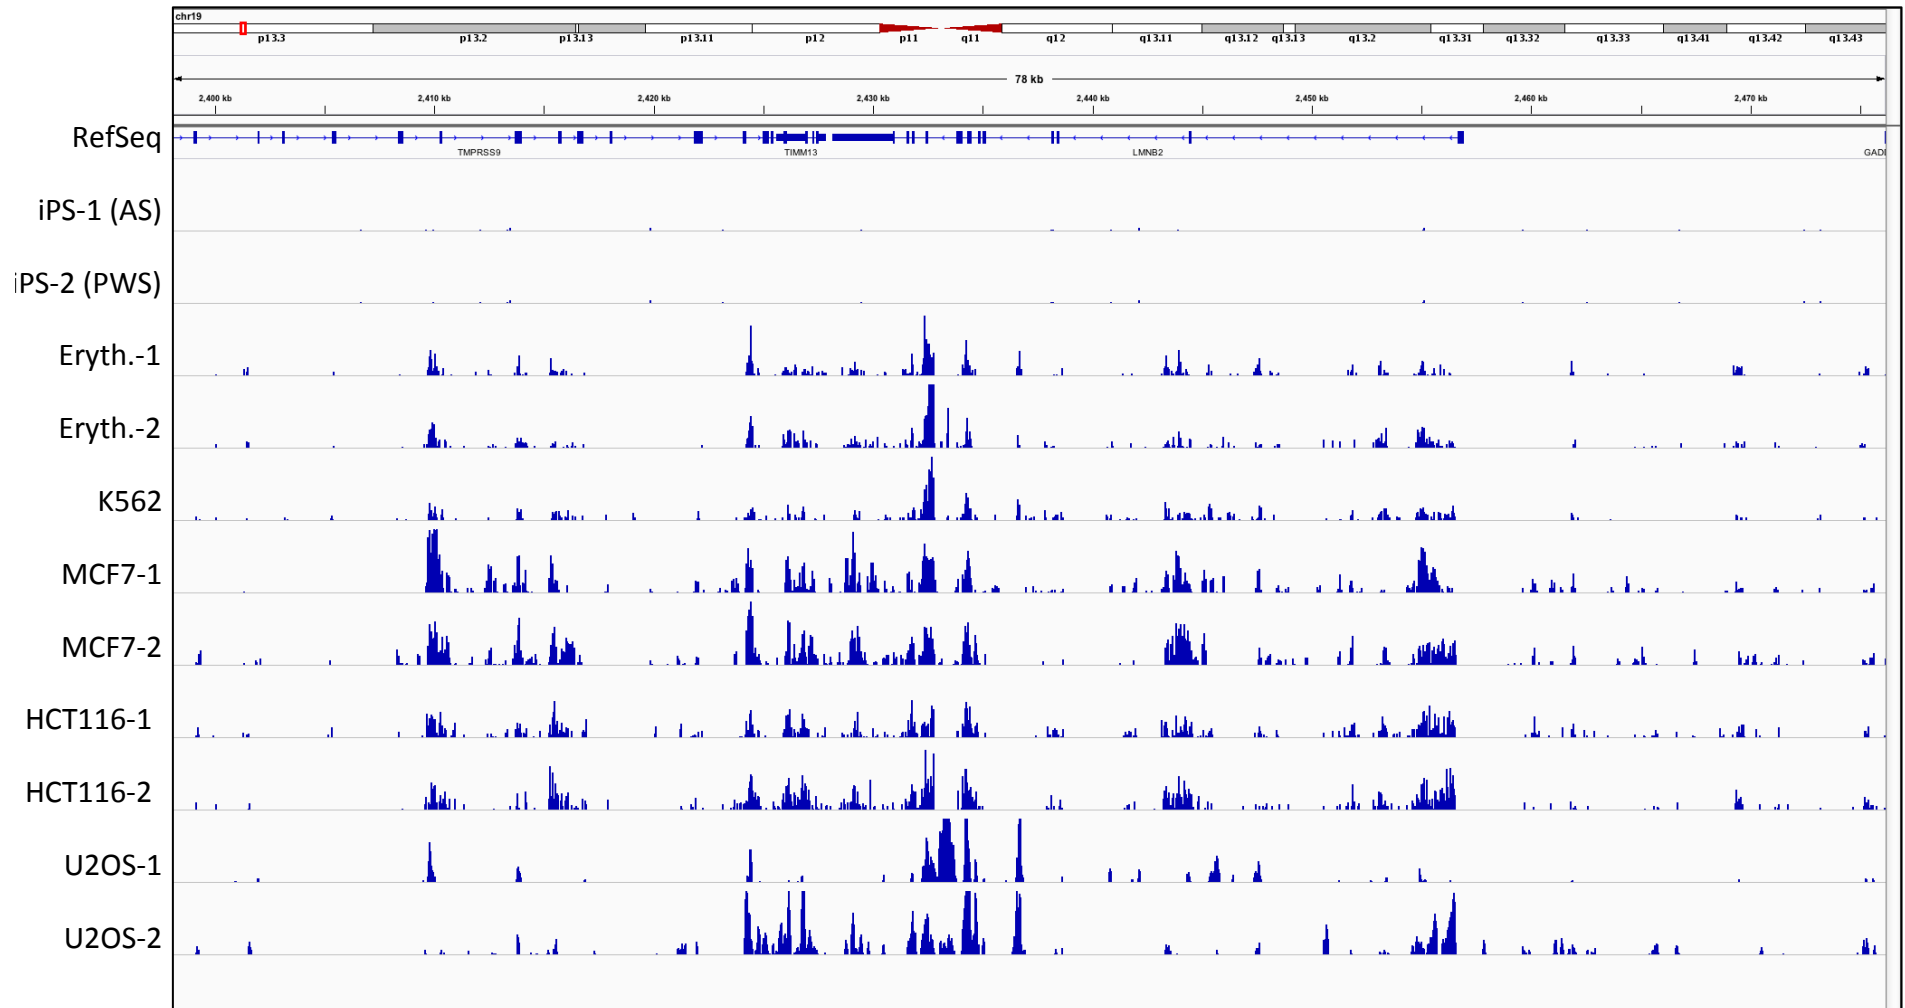

Figure S2: Comparison of reproducibility using Irreproducibility Discovery Rate (IDR)

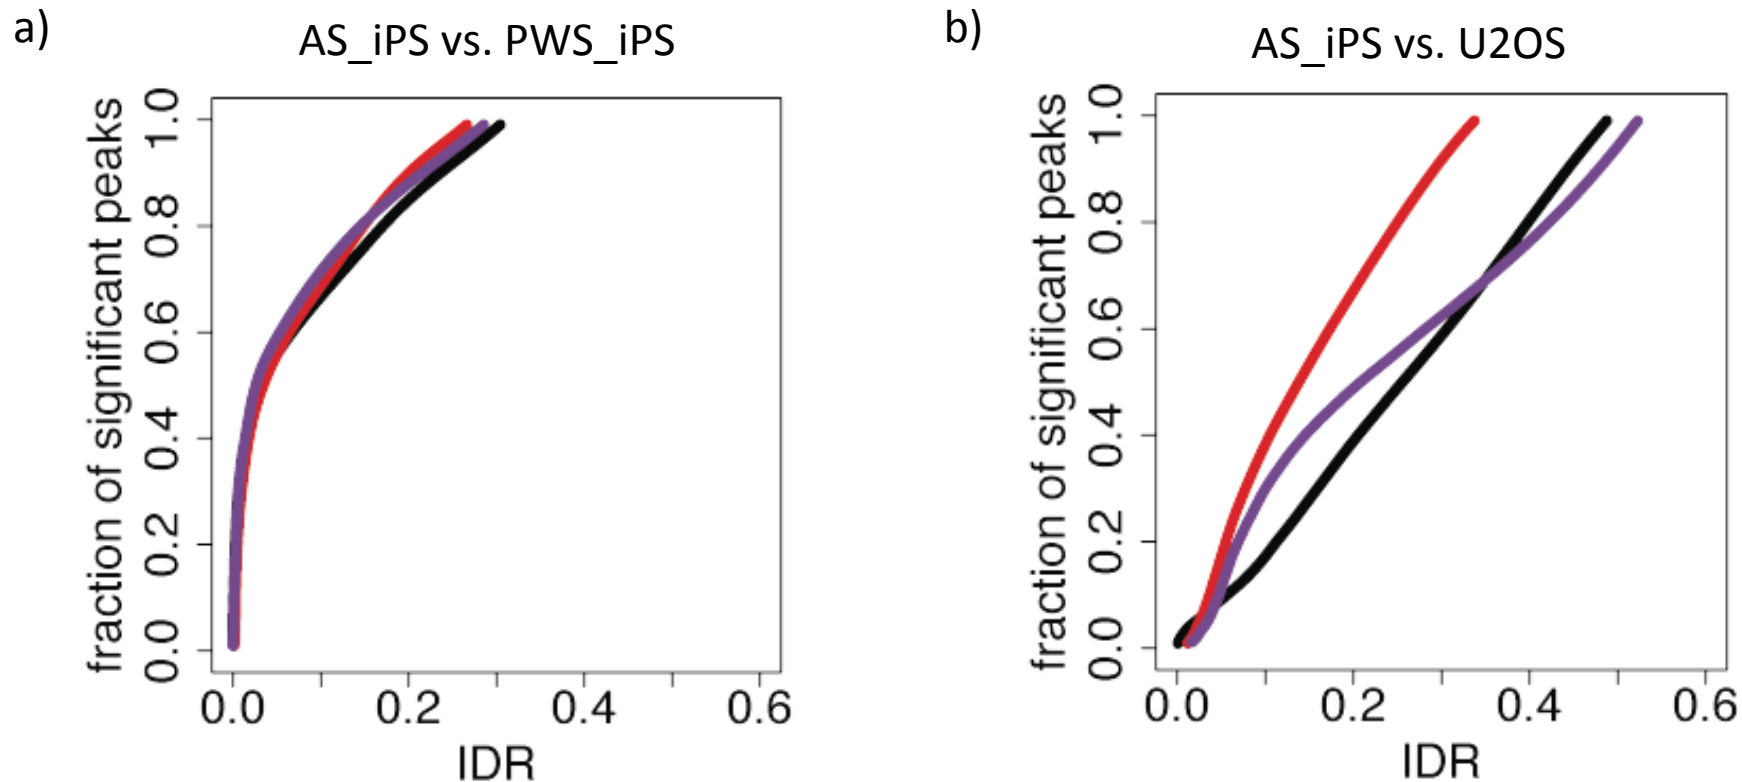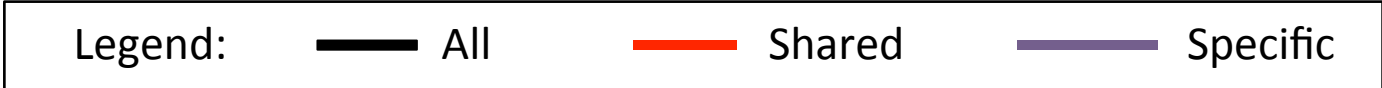



Figure S3

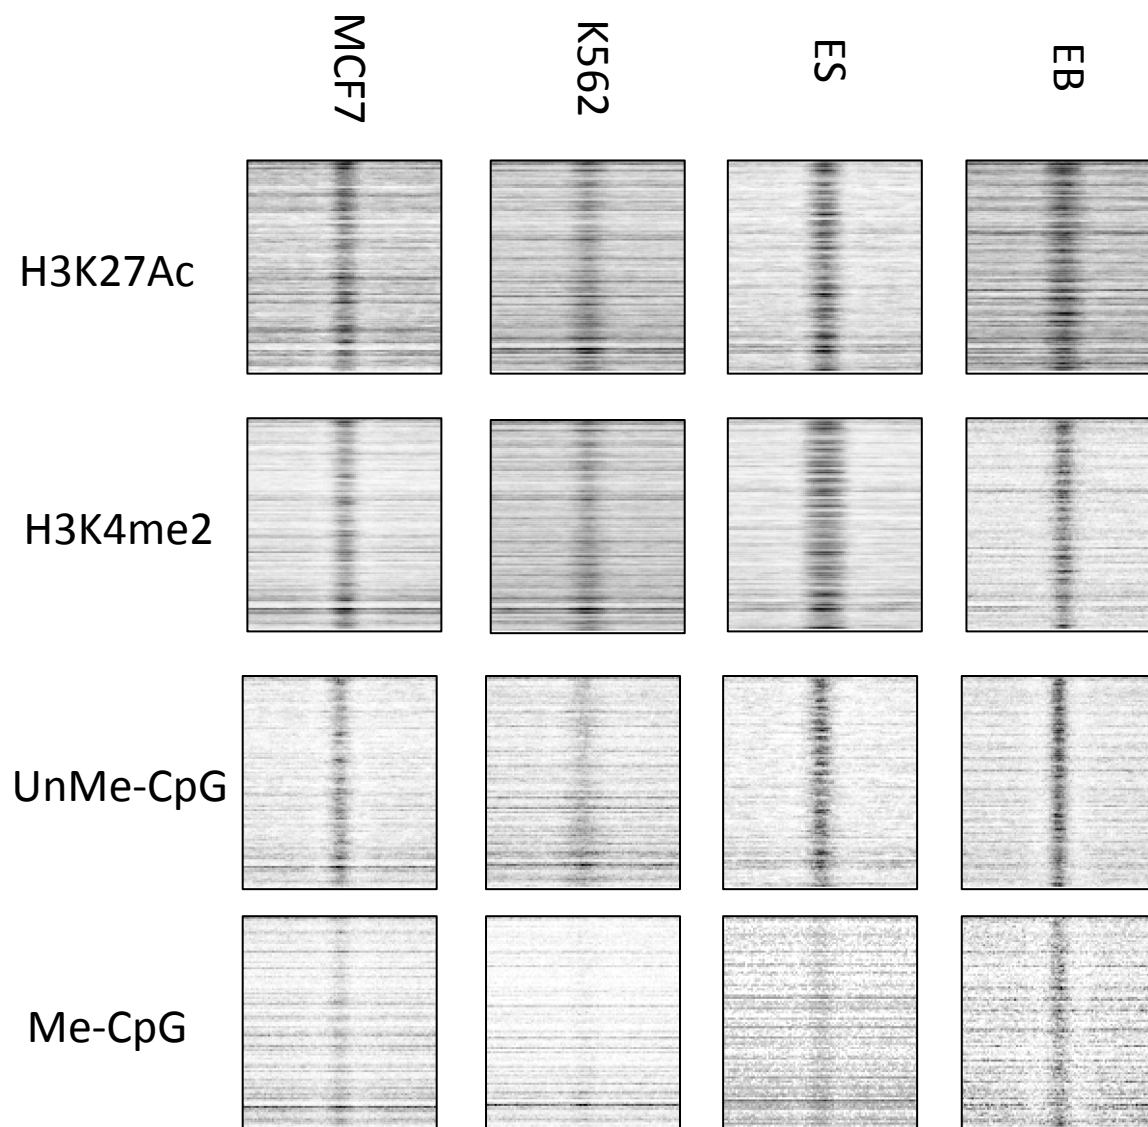

Supplement: 13072_2016_67_MOESM1_ESM.pdf [file 13072_2016_67_MOESM1_ESM.pdf]
